# Supplementary material
Source: publisher figshare collection journal article supplement (https://tandf.figshare.com/ndownloader/files/29017458)
Supplement: Supplementary file 1 [file 29017458]

Supplementary Table 1.Cost distribution in patients with different severities of DED

|  |  | Mild DED ($) | Moderate DED ($) | Severe DED ($) | *P* value |
| --- | --- | --- | --- | --- | --- |
| Case |  | 132 | 68 | 21 |  |
| DED related examination | Mean ± SD | 49.99 ± 25.22 | 56.85 ± 26.04 | 67.72 ± 34.57c | 0.002ab |
| Range | 28.71–179.84 | 28.71–149.61 | 28.71–178.33 |
| Basic examination | Mean ± SD | 12.00 ± 8.37 | 15.96 ± 11.55 | 24.97 ± 13.45cd | <0.001ab |
| Range | 6.50-71.18 | 6.50–67.10 | 8.01–68.91 |
| Artificial tears eye drops | Mean ± SD | 23.00 ± 22.59 | 37.69 ± 35.05c | 57.73 ± 28.46cd | <0.001ab |
| Range | 0.00–147.08 | 0.00–163.68 | 10.01–115.50 |
| Anti–inflammatory eye drops | Mean ± SD | 3.44 ± 8.30 | 8.18 ± 22.27 | 39.69 ± 70.10 | 0.114a |
| Range | 0.00–42.74 | 0.00–129.11 | 0.00–232.81 |
| Other eye drops | Mean ± SD | 11.75 ± 16.44 | 20.55 ± 26.87c | 32.35 ± 29.41c | <0.001ab |
| Range | 0.00–113.46 | 0.00–164.51 | 0.00–109.58 |
| Physiotherapy | Mean ± SD | 257.72 ± 233.46 | 388.78 ± 278.17c | 477.72 ± 326.33c | 0.001ab |
| Range | 0.00–725.40 | 0.00–997.43 | 0.00–1265.68 |
| Products | Mean ± SD | 9.98 ± 37.04 | 28.91 ± 56.91c | 83.23 ± 100.28cd | <0.001ab |
| Range | 0.00–265.98 | 0.00–223.67 | 0.00–269.00 |
| Total | Mean ± SD | 367.88 ± 248.55 | 556.93 ± 305.17 | 783.41 ± 310.42 | <0.001 ab |
| Range | 56.16-929.08 | 79.23-1282.68 | 394.08-1708.07 |

DED = dry eye disease.

aKruskal–Wallis test.

bP<0.05.

cCompared with mild cases, *P*<0.0167 (Bonferroni correction).

dCompared with moderate cases, *P*<0.0167 (Bonferroni correction).
